# Supplementary material
Source: Springer Nature journal article supplement (https://www.springermedizin.de/resource/supplementary/12895_2013_168_MOESM4_ESM.pdf/9514256)

**Mean number of days  
within the past month**

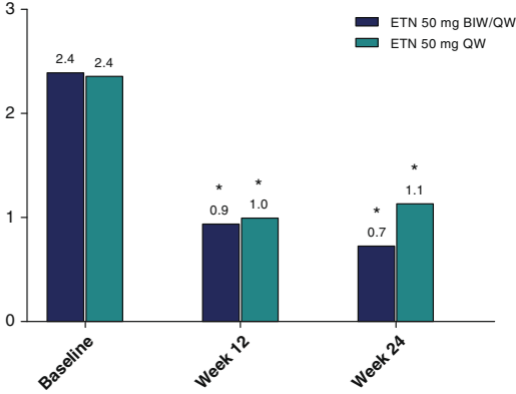

Supplement: MOESM4 [file 9514256]
